# Supplementary material for: Review of Kissing Bugs (Hemiptera: Reduviidae: Triatominae) from China with Descriptions of Two New Species
Source: MDPI journal article supplement (doi:10.3390/insects14050450), 2023-05-10
Supplement: s1 [file s1]

## Supplementary Materials

**Table S1.** Collecting information of newly sequenced species.

| Species                                       | Geographical locality                                                                | Collection date |
|-----------------------------------------------|--------------------------------------------------------------------------------------|-----------------|
| <i>Triatoma picta</i> Zhao & Cai, sp. nov.    | Jianfeng Mountain, Ledong Li Autonomous County, Hainan, China                        | 26. IV. 2016    |
| <i>Triatoma atrata</i> Zhao & Cai sp. nov.    | Binchuan County, Dali Bai Autonomous Prefecture, Yunnan (25.70 °N, 100.55 °E), China | 8. VI. 2020     |
| <i>Triatoma migrans</i> Breddin, 1903         | Borneo Jungle girl camp, Kinabalu, Malaysia                                          | 25. VIII. 2016  |
| <i>Triatoma rubrofasciata</i> (De Geer, 1773) | Zhizhen Village, Baisha Li Autonomous County, Hainan, China                          | 10. VI. 2017    |

**Table S2.** Nucleotide Frequencies of mitochondrial COI barcode sequences of *Triatoma*.

| Samples                     | GenBank accession number | T(U) | C    | A    | G    | Total |
|-----------------------------|--------------------------|------|------|------|------|-------|
| <i>T. picta</i> *           | OP062225                 | 33.7 | 19.6 | 29.3 | 17.3 | 658   |
| <i>T. atrata</i> *          | OP062226                 | 35.6 | 18.7 | 29.9 | 15.8 | 658   |
| <i>T. migrans</i> *         | OP062227                 | 35.0 | 19.8 | 28.7 | 16.6 | 658   |
| <i>T. rubrofasciata</i> *   | OP062228                 | 33.4 | 21.1 | 28.0 | 17.5 | 658   |
| <i>T. vanda</i>             | KC249392                 | 29.2 | 25.2 | 28.6 | 17.0 | 658   |
| <i>T. guasayana</i>         | MH029699                 | 30.7 | 24.5 | 27.2 | 17.6 | 658   |
| <i>T. circummaculata</i>    | KC249324                 | 30.1 | 23.4 | 29.3 | 17.2 | 658   |
| <i>T. brasiliensis</i>      | KJ580488                 | 29.9 | 24.3 | 28.3 | 17.5 | 658   |
| <i>T. infestans</i>         | NC_035547                | 30.7 | 23.4 | 28.4 | 17.5 | 658   |
| <i>T. bolivari</i>          | KY033219                 | 32.1 | 23.1 | 28.3 | 16.6 | 658   |
| <i>T. rubida</i>            | MT556664                 | 31.6 | 21.0 | 31.0 | 16.4 | 658   |
| <i>T. barberi</i>           | MT556655                 | 33.0 | 22.0 | 27.7 | 17.3 | 658   |
| <i>T. protracta</i>         | MT556662                 | 35.6 | 19.0 | 27.8 | 17.6 | 658   |
| <i>T. lecticularia</i>      | MT556650                 | 33.9 | 20.8 | 28.0 | 17.3 | 658   |
| <i>T. gerstaeckeri</i>      | MT587783                 | 32.4 | 20.8 | 28.6 | 18.2 | 658   |
| <i>T. mexicana</i>          | NC_050324                | 31.6 | 22.0 | 29.3 | 17.0 | 658   |
| <i>T. mazzottii</i>         | MT556651                 | 33.1 | 21.0 | 28.7 | 17.2 | 658   |
| <i>T. phyllosoma</i>        | MT556660                 | 33.1 | 21.0 | 28.4 | 17.5 | 658   |
| <i>T. huehuetenaguensis</i> | MT556649                 | 31.8 | 22.0 | 29.3 | 16.9 | 658   |
| <i>T. picturata</i>         | MT556661                 | 31.9 | 21.4 | 29.3 | 17.3 | 658   |
| <i>T. sanguisuga</i>        | MT556653                 | 31.6 | 21.9 | 28.7 | 17.8 | 658   |
| <i>T. dispar</i>            | MN621059                 | 32.1 | 22.2 | 28.6 | 17.2 | 658   |
| <i>T. longipennis</i>       | KY033220                 | 38.0 | 17.0 | 28.3 | 16.7 | 658   |
| Avg.                        |                          | 32.6 | 21.5 | 28.7 | 17.2 | 658   |
